# Supplementary material
Source: PubMed Central journal article supplement (PMC4528599)
Supplement: rsif20150319supp1.pdf [file rsif20150319supp1.pdf]

SUPPLEMENTARY TABLE

**Emergence of collective changes in travel direction of starling flocks  
from individual birds' fluctuations**

Alessandro Attanasi<sup>1,2</sup>, Andrea Cavagna<sup>1,2,3</sup>, Lorenzo Del Castello<sup>1,2</sup>, Irene Giardina<sup>1,2,3</sup>‡, Asja Jelic<sup>1,2</sup>‡,\*  
Stefania Melillo<sup>1,2</sup>, Leonardo Parisi<sup>1,2,4</sup>, Oliver Pohl<sup>1,2</sup>,† Edward Shen<sup>1,2</sup>, and Massimiliano Viale<sup>1,2</sup>

<sup>1</sup> *Istituto Sistemi Complessi, Consiglio Nazionale delle Ricerche, UOS Sapienza, 00185 Rome, Italy*

<sup>2</sup> *Dipartimento di Fisica, Università Sapienza, 00185 Rome, Italy*

<sup>3</sup> *Initiative for the Theoretical Sciences, The Graduate Center,  
City University of New York, 10016 New York, USA*

<sup>4</sup> *Dipartimento di Informatica, Università Sapienza, 00198 Rome, Italy and*

‡ *e-mail: asja.jelic@gmail.com, irene.giardina@roma1.infn.it*

| EVENT  | EVENT               | $N$ | $\Phi$ | $\mathbf{I}_1 \cdot \mathbf{G}$ | $\mathbf{I}_3 \cdot \mathbf{G}$ | $\mathbf{V}_1 \cdot \mathbf{G}$ | $\mathbf{I}_3 \cdot \mathbf{V}_1$ | $\mathbf{I}_3 \cdot \mathbf{V}_2$ | $\mathbf{I}_3 \cdot \frac{\mathbf{d}_0}{\ \mathbf{d}_0\ }$ | $\mathbf{V}_1 \cdot \frac{\mathbf{d}_0}{\ \mathbf{d}_0\ }$ | $\mathbf{V}_2 \cdot \frac{\mathbf{d}_0}{\ \mathbf{d}_0\ }$ |
|--------|---------------------|-----|--------|---------------------------------|---------------------------------|---------------------------------|-----------------------------------|-----------------------------------|------------------------------------------------------------|------------------------------------------------------------|------------------------------------------------------------|
| NUMBER | LABEL               |     |        | at $t_1$                        | at $t_1$                        | at $t_1$                        | at $t_1$                          | at $t_1$                          | at $t_1$                                                   | at $t_2$                                                   | at $t_1$                                                   |
| E1     | 20110208.ACQ3       | 176 | 0.806  | 0.95                            | 0.15                            | 0.47                            | 0.14                              | 0.93                              | 0.97                                                       | 0.08                                                       | -0.91                                                      |
| E2     | 20111124.ACQ1       | 125 | 0.959  | 0.97                            | 0.15                            | 0.01                            | 0.65                              | 0.99                              | 0.97                                                       | 0.81                                                       | -0.78                                                      |
| E3     | 20111125.ACQ1       | 50  | 0.866  | 0.86                            | 0.42                            | 0.26                            | 0.41                              | 0.88                              | 0.91                                                       | 0.05                                                       | -0.82                                                      |
| E4     | 20111214.ACQ4.F1    | 154 | 0.940  | 0.69                            | 0.72                            | 0.03                            | 0.12                              | 0.63                              | 0.97                                                       | 0.10                                                       | -0.83                                                      |
| E5     | 20111215.ACQ1       | 384 | 0.801  | 0.97                            | 0.16                            | 0.13                            | 0.24                              | 0.92                              | 0.98                                                       | 0.05                                                       | -0.94                                                      |
| E6     | 20111125.ACQ2       | 502 | 0.841  | 0.98                            | 0.16                            | 0.35                            | 0.38                              | 0.89                              | 1.00                                                       | 0.43                                                       | 0.74                                                       |
| E7     | 20110217.ACQ2       | 404 | 0.854  | 0.91                            | 0.32                            | 0.39                            | 0.34                              | 0.96                              | 0.78                                                       | 0.83                                                       | -0.89                                                      |
| E8     | 20111220.ACQ2       | 197 | 0.907  | 0.98                            | 0.03                            | 0.94                            | 0.30                              | 0.90                              | 0.56                                                       | 0.20                                                       | -0.53                                                      |
| E9     | 20111201.ACQ3.F1    | 133 | 0.793  | 0.76                            | 0.46                            | 0.04                            | 0.21                              | 0.99                              | 0.89                                                       | 0.21                                                       | 0.78                                                       |
| E10    | 20110211.ACQ1       | 595 | 0.757  | 0.94                            | 0.10                            | 0.34                            | 0.03                              | 0.36                              | 0.91                                                       | 0.37                                                       | -0.96                                                      |
| E11    | 20111214.ACQ4.F2.T1 | 139 | 0.890  | 0.35                            | 0.87                            | 0.67                            | 0.92                              | 0.56                              | 0.84                                                       | 0.74                                                       | 0.08                                                       |
| E12    | 20111214.ACQ4.F2.T2 | 139 | 0.808  | 0.66                            | 0.74                            | 0.11                            | 0.58                              | 0.79                              | 0.89                                                       | 0.15                                                       | 0.39                                                       |

TABLE S1. **Global quantitative properties of the turning events.** We analyzed twelve turning events, of which two (E11 and E12) are performed by the same flock one after the other (therefore marked T1 and T2 in the event label).  $N$  is the number of birds in the flock. The polarization is defined as  $\Phi = \|(1/N) \sum_i \mathbf{v}_i / \|\mathbf{v}_i\|\|$ . In the remaining columns we report absolute values of the scalar products between yaw  $\mathbf{I}_1$  (the axis relative to the shortest dimension of the flock), the longest elongation axis  $\mathbf{I}_3$ , and gravity  $\mathbf{G}$ , with the direction of motion before and after the turn given by velocity vectors  $\mathbf{V}_1$  and  $\mathbf{V}_2$  at times  $t_1$  and  $t_2$ , respectively. The scalar products are calculated using the values of appropriate quantities at times  $t_1$  of the start of the turn, or  $t_2$  at the end of the turn, as indicated. Note that the vectors  $\mathbf{I}_1$ ,  $\mathbf{I}_3$ , and  $\mathbf{G}$  are unitary by definition, while for the direction of motion we used normalized velocity vectors  $\mathbf{n}_1 \equiv \mathbf{n}(t_1) = \mathbf{V}(t_1) / \|\mathbf{V}(t_1)\|$  and  $\mathbf{n}(t_2) = \mathbf{V}(t_2) / \|\mathbf{V}(t_2)\|$ , which are for clarity called  $\mathbf{V}_1$  and  $\mathbf{V}_2$  in the column titles. Finally, in order to quantify the location of the origin of the turn, we use a mean relative position of the 10 top-ranked birds with respect to the barycenter of the flock,  $\mathbf{d}_0$ , as defined in the main text. We calculate absolute scalar products of the normalized vector  $\mathbf{d}_0 / \|\mathbf{d}_0\|$  with the unitary vector  $\mathbf{I}_3$  of the longest elongation axes at  $t_1$ , as well as with the direction of motion at the start of the turn  $\mathbf{n}_1$ . In the last column, we report the scalar product between  $\mathbf{d}_0 / \|\mathbf{d}_0\|$  and the new direction of motion after the turn, given by the unitary velocity vector  $\mathbf{n}(t_2) = \mathbf{V}(t_2) / \|\mathbf{V}(t_2)\|$  (called  $\mathbf{V}_2$  for simplicity). Note that absolute values of all scalar products are reported, except for the last one whose negative values signify that the top-ranked birds initiated the turn in the direction towards the flock's barycenter (towards inside of the flock and not outside).

\* Present address: The Abdus Salam International Centre for Theoretical Physics (ICTP), Strada Costiera 11, 34014 Trieste, Italy.

† Present address: Institut für Theoretische Physik, Technische Universität Berlin, Hardenbergstrasse 36, D-10623 Berlin-Charlottenburg, Germany.
